# Supplementary material
Source: PubMed Central journal article supplement (PMC4850735)

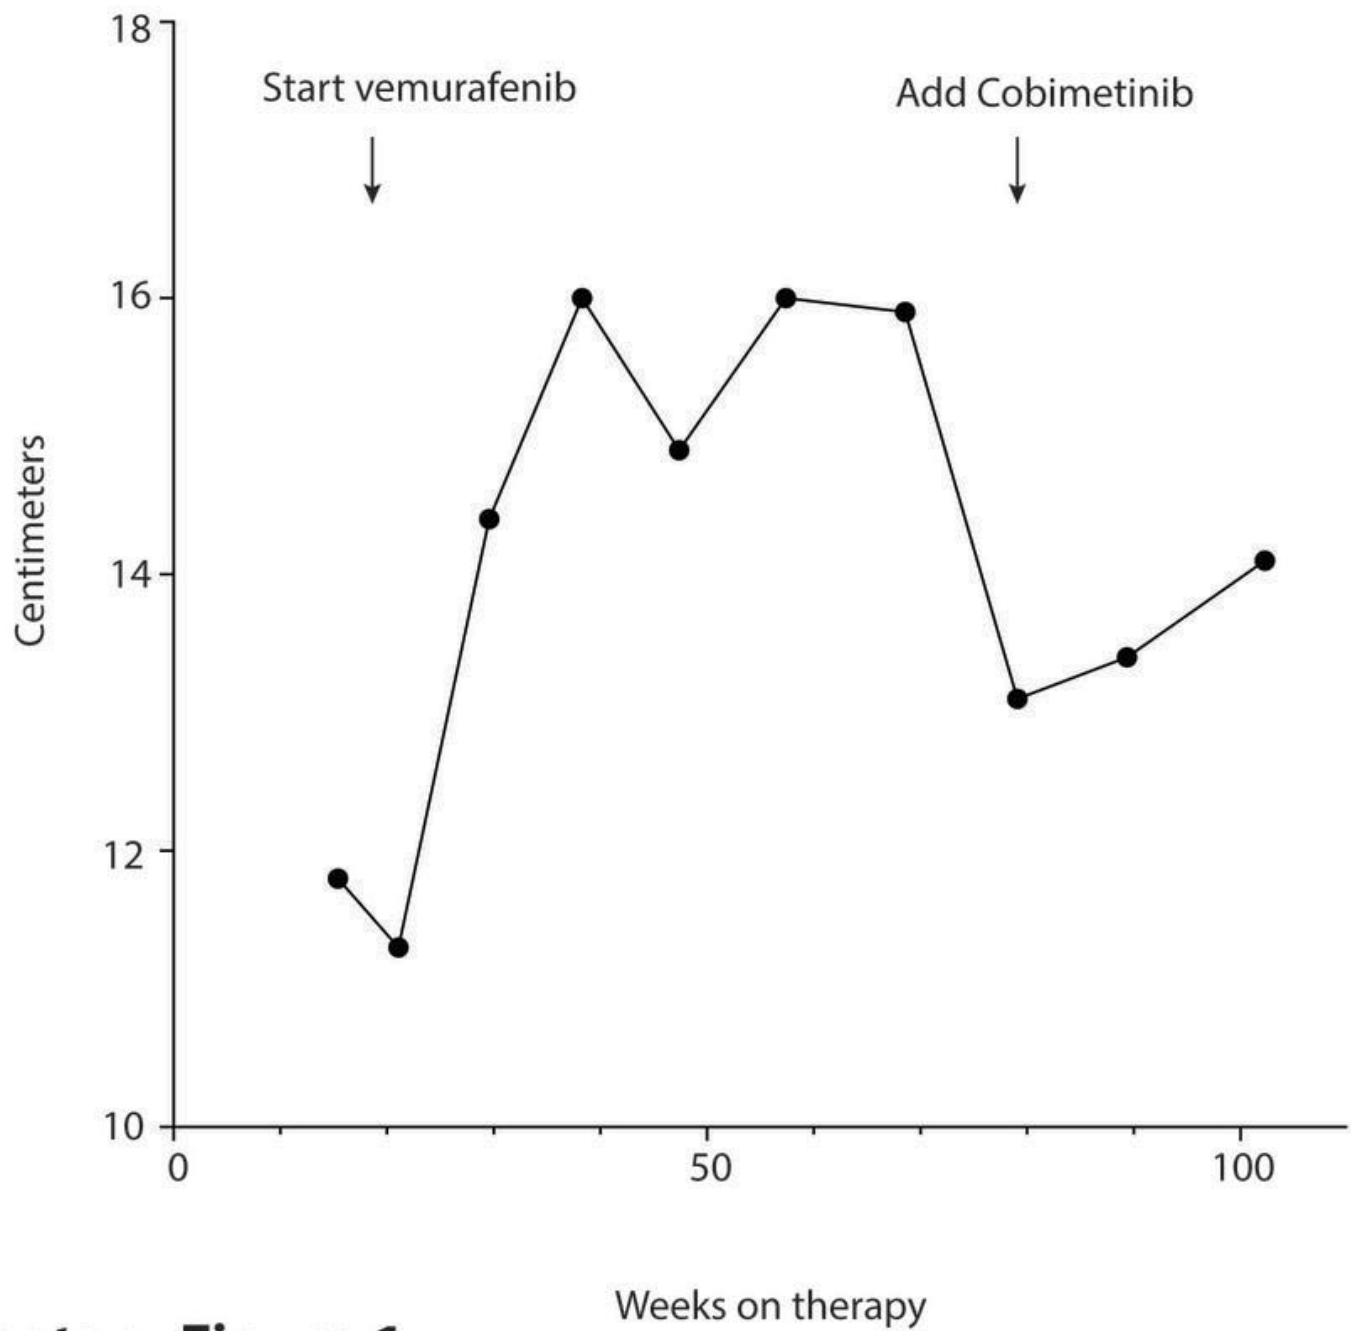

**Supplementary Figure 1**

Supplement: NIHMS745325-supplement-Supplementary_Figure_1.pdf [file NIHMS745325-supplement-Supplementary_Figure_1.pdf]

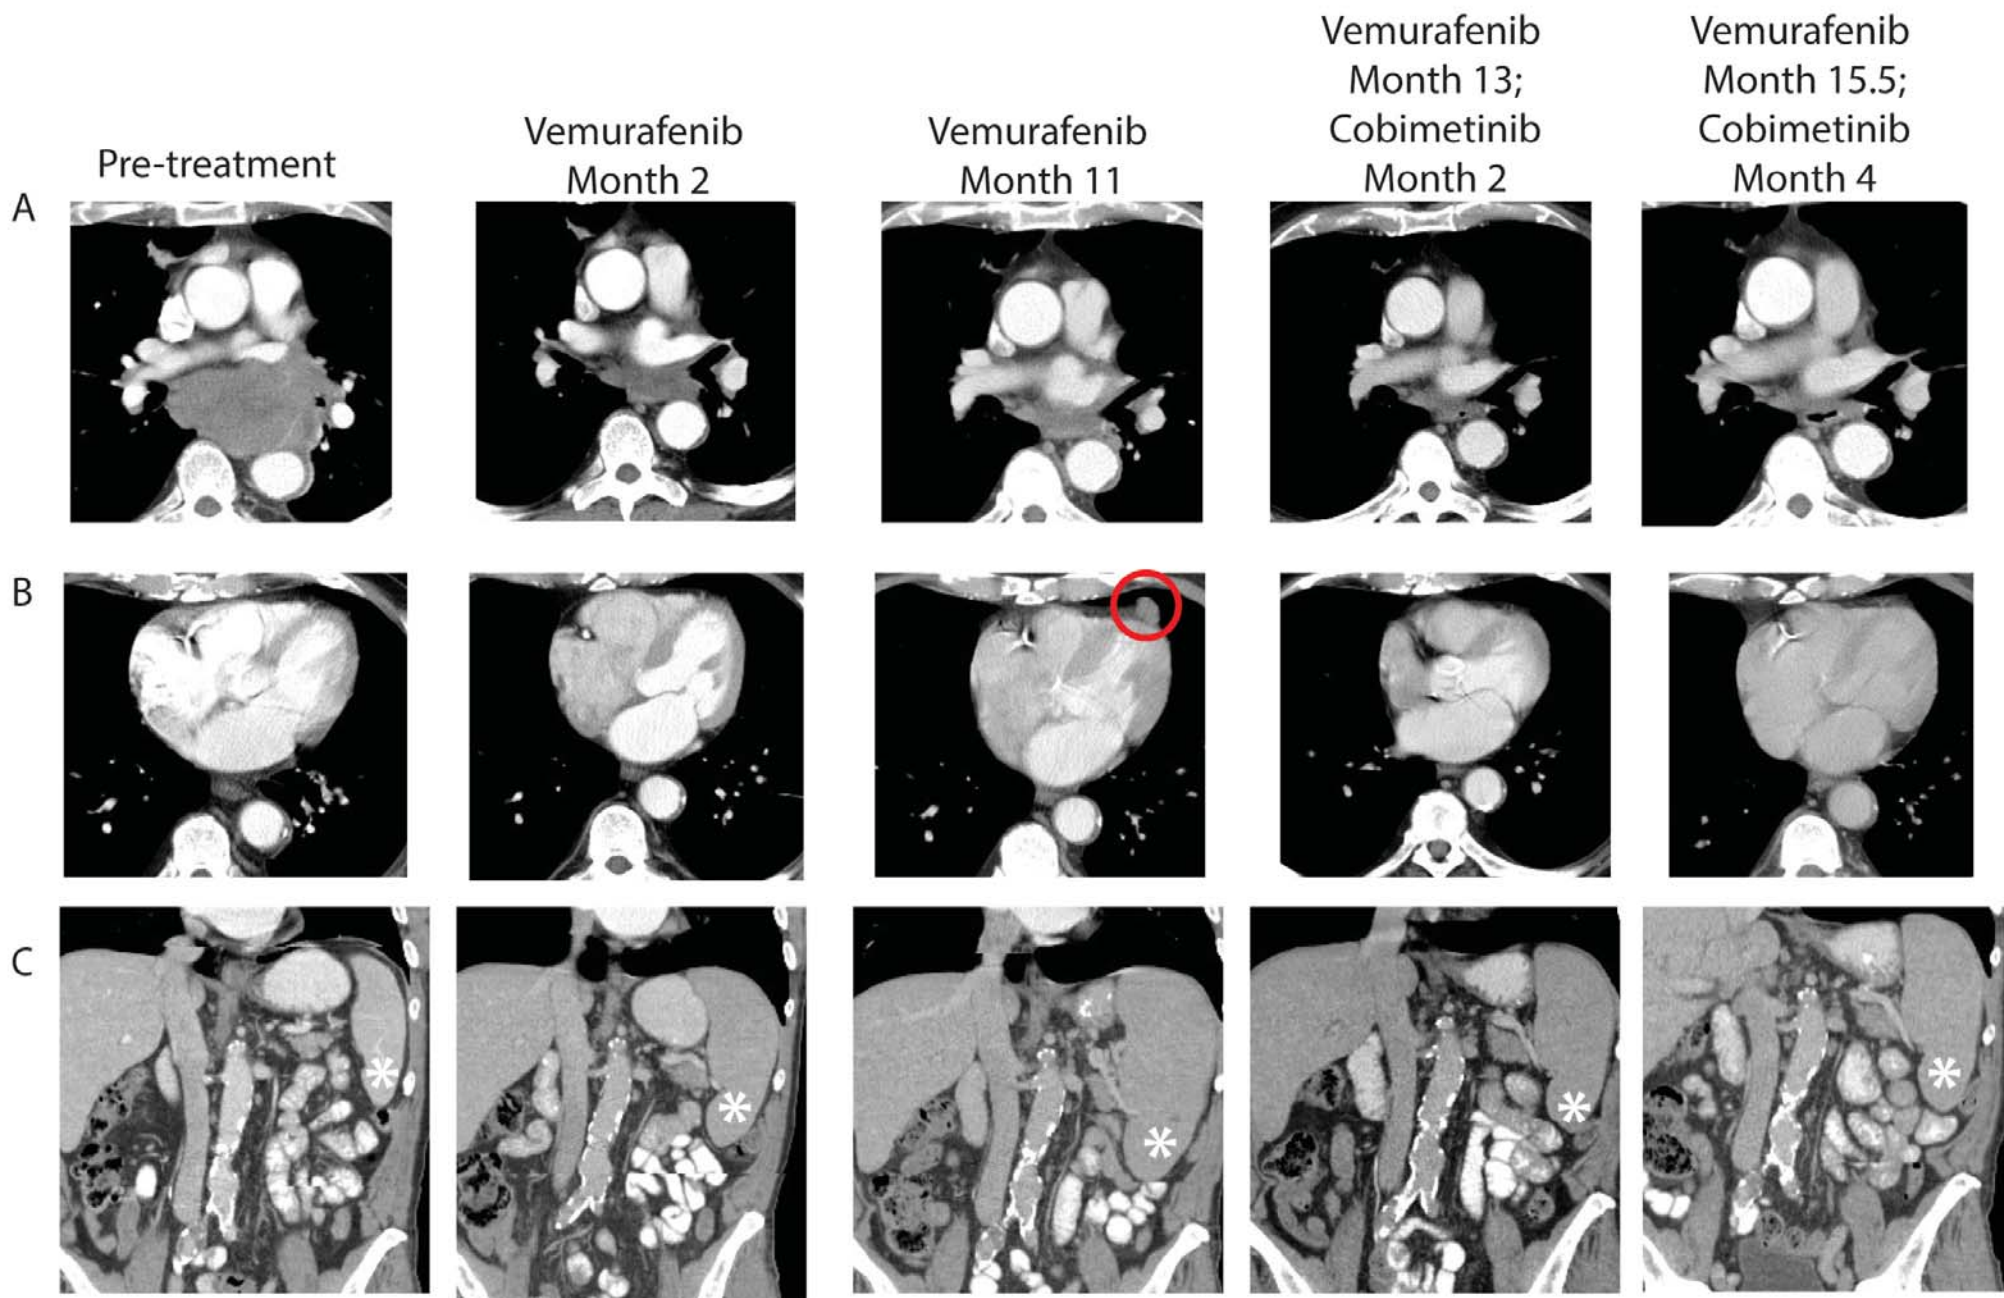

**Supplementary Figure 2**

Supplement: NIHMS745325-supplement-Supplementary_Figure_2.pdf [file NIHMS745325-supplement-Supplementary_Figure_2.pdf]

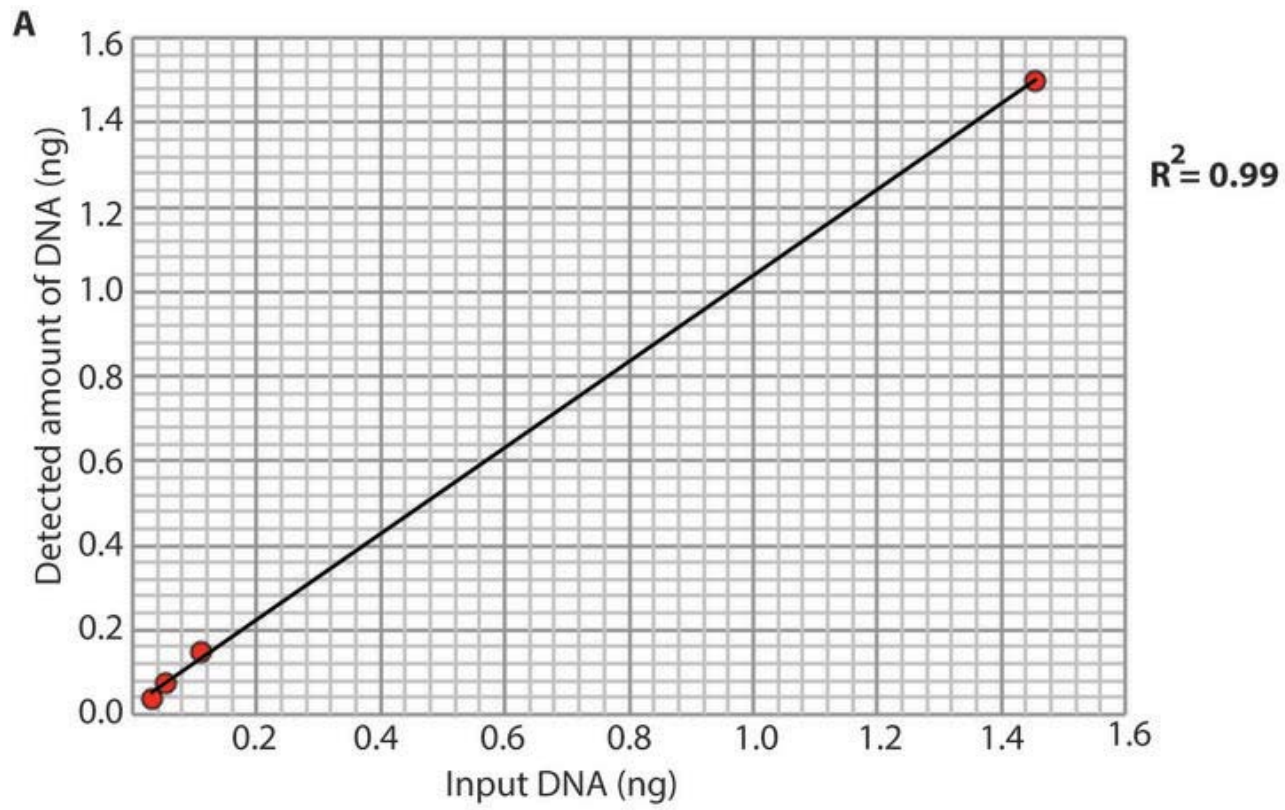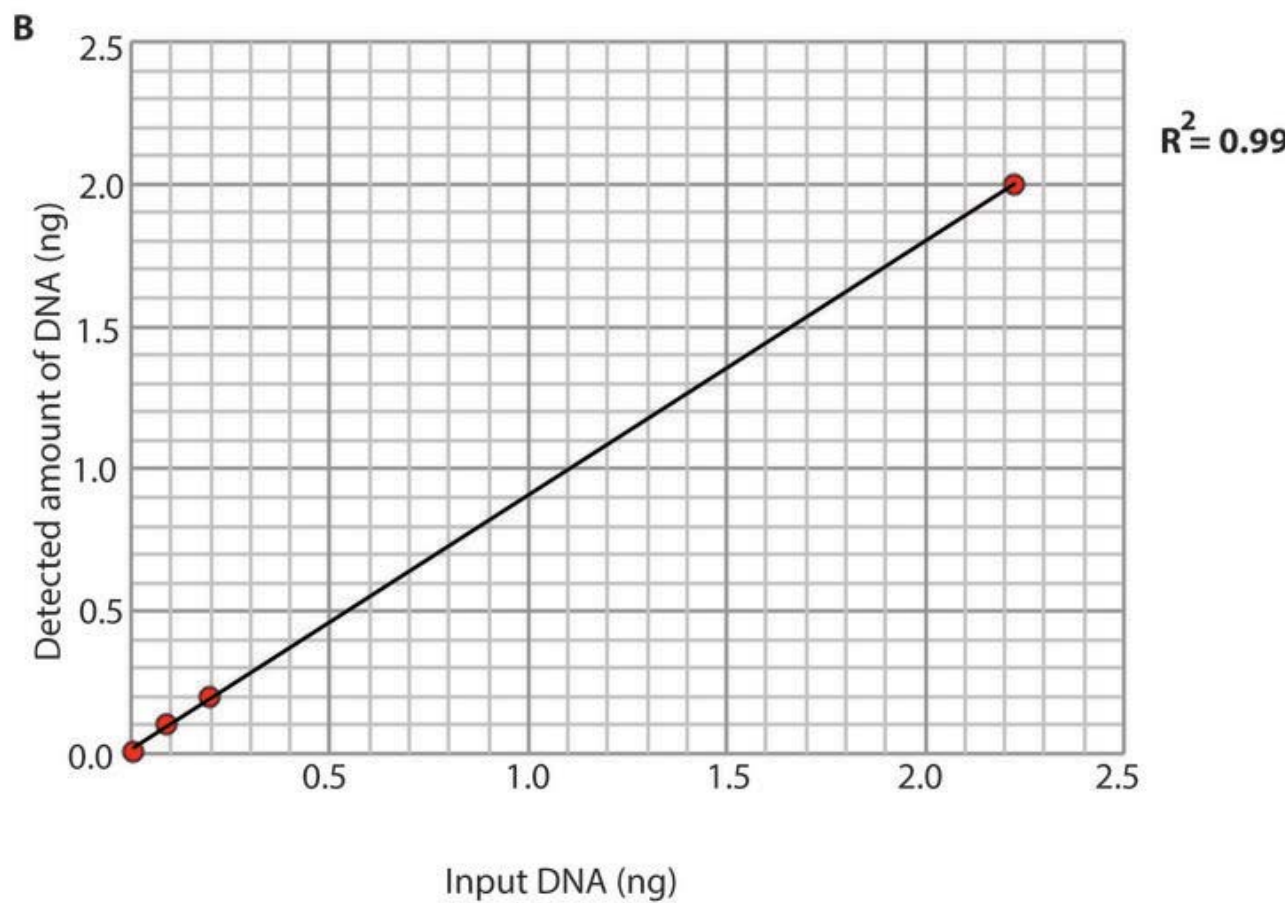

**Supplementary Figure 3**

Supplement: NIHMS745325-supplement-Supplementary_Figure_3.pdf [file NIHMS745325-supplement-Supplementary_Figure_3.pdf]

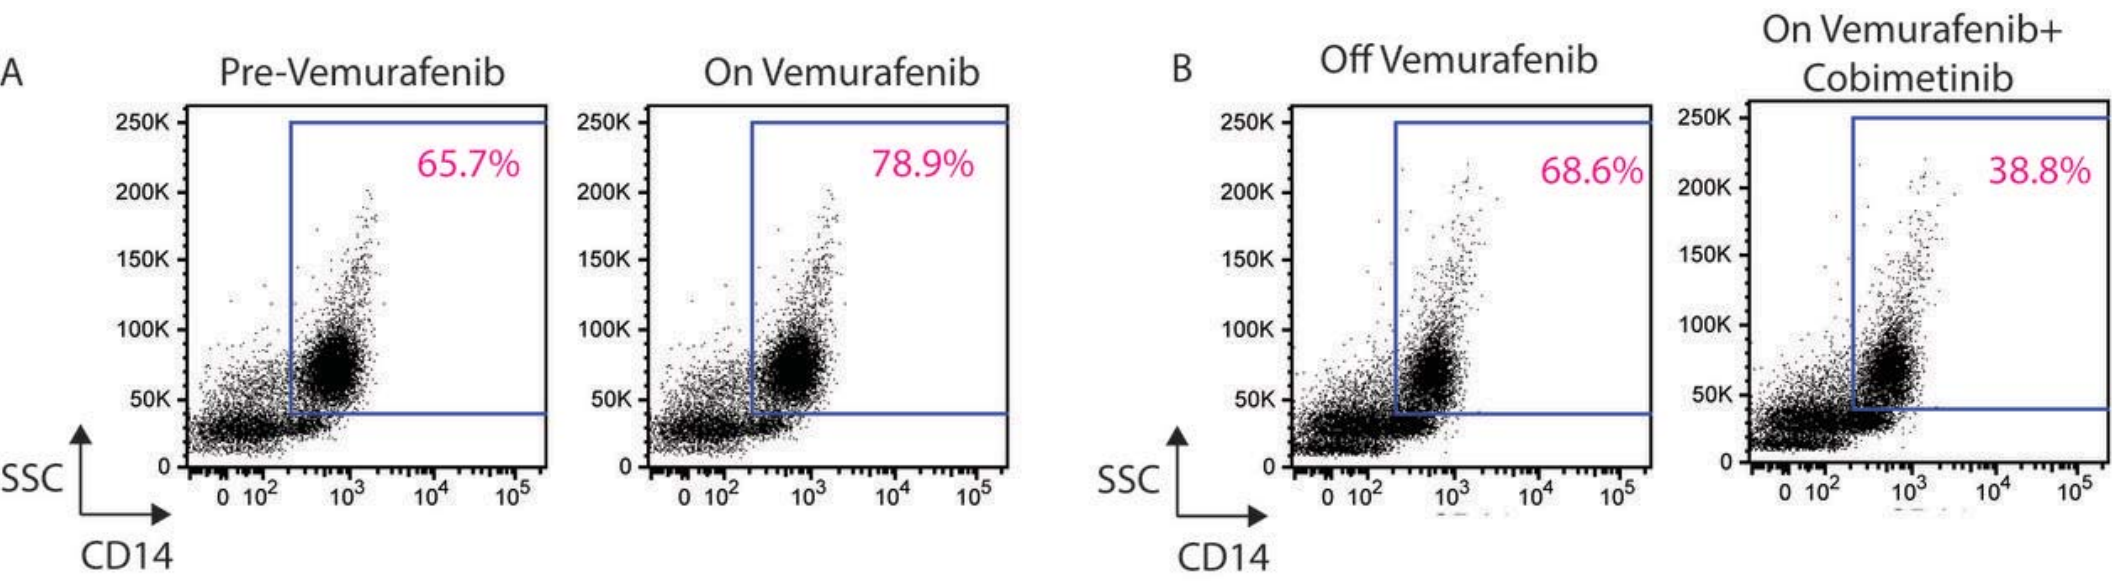

Gated on CD14+ cells

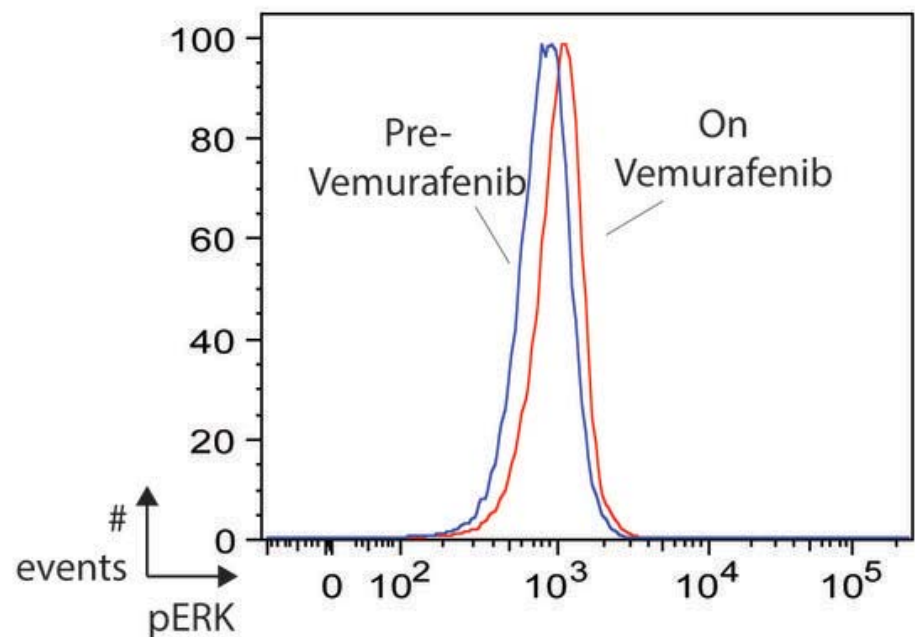

Gated on CD14+ cells

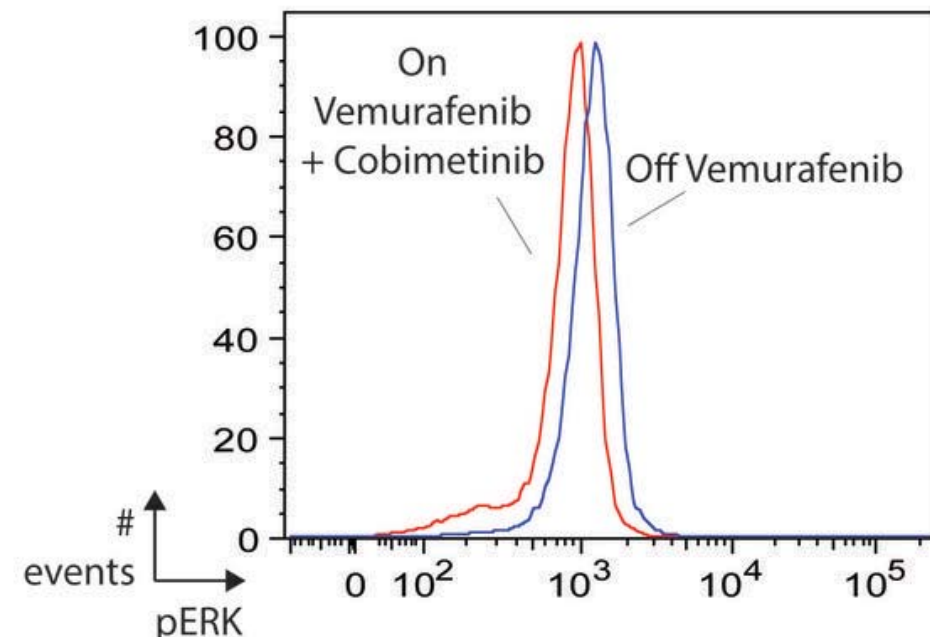

**Supplementary Figure 4**

Supplement: NIHMS745325-supplement-Supplementary_Figure_4.pdf [file NIHMS745325-supplement-Supplementary_Figure_4.pdf]
